# Supplementary material for: Temporal asymmetries in inferring unobserved past and future events
Source: PubMed Central journal article supplement (PMC11445511; doi:10.1038/s41467-024-52627-5), 2024-10-01
Supplement: 41467_2024_52627_MOESM1_ESM.pdf [file 41467_2024_52627_MOESM1_ESM.pdf]

1 *Supplementary materials for: Temporal asymmetries in*  
2 *inferring unobserved past and future events*

3 Xinming Xu<sup>1</sup>, Ziyang Zhu<sup>2</sup>, Xueyao Zheng<sup>3</sup>, and Jeremy R. Manning<sup>1, \*</sup>

4 <sup>1</sup>Dartmouth College, Hanover, NH, USA

5 <sup>2</sup>Peking University, Beijing, China

6 <sup>3</sup>Beijing Normal University, Beijing, China

7 \*Address correspondence to [jeremy.r.manning@dartmouth.edu](mailto:jeremy.r.manning@dartmouth.edu)

8 September 12, 2024

Table S1: **Stimulus descriptions (main experiment).**

| Storyline | Segment | Episode | Duration (s) | Main characters                | Number of events <sup>a</sup> |                        |
|-----------|---------|---------|--------------|--------------------------------|-------------------------------|------------------------|
|           |         |         |              |                                | Onscreen                      | Offscreen <sup>b</sup> |
| 1         | 1       | 1       | 105          | Beth, Sheila, Rob, Leo         | 4                             | 7                      |
| 1         | 2       | 1       | 172          | Beth, Sheila, Rob, Leo         | 7 [1]                         | 3                      |
| 1         | 3       | 1       | 70           | Beth, Sheila, One neighbor     | 6                             | 2                      |
| 1         | 4       | 1       | 135          | Beth, Sheila                   | 8 [1]                         | 1                      |
| 1         | 5       | 1       | 90           | Beth, Rob, April               | 8                             | 4                      |
| 1         | 6       | 1       | 188          | Beth, Rob                      | 6 [2]                         | 1                      |
| 1         | 7       | 1       | 91           | Beth, Sheila                   | 5 [1]                         | 2                      |
| 1         | 8       | 1       | 142          | Beth, April                    | 4 (1) [2]                     | 3 (1)                  |
| 1         | 9       | 2       | 134          | Beth, April                    | 4 [2]                         | 1                      |
| 1         | 10      | 2       | 58           | Beth                           | 3 [1]                         | 6 [1]                  |
| 1         | 11      | 2       | 159          | Beth, Rob                      | 9                             |                        |
| 2         | 1       | 1       | 70           | Simone, Karl                   | 3 [1]                         | 6                      |
| 2         | 2       | 1       | 119          | Simone, Karl, Naomi, Tommy     | 4 [1]                         | 2                      |
| 2         | 3       | 1       | 58           | Simone, Karl, Tommy            | 4                             | 2                      |
| 2         | 4       | 1       | 102          | Simone, Karl                   | 4                             | 6                      |
| 2         | 5       | 1       | 134          | Simone, Karl, Tommy            | 6 (3) [1]                     | 3                      |
| 2         | 6       | 1       | 81           | Simone, Karl, Neighbors, Wanda | 4 (1)                         | 6                      |
| 2         | 7       | 1       | 194          | Simone, Tommy                  | 8                             | 3                      |
| 2         | 8       | 2       | 101          | Simone, Karl                   | 3 (1)                         | 1                      |
| 2         | 9       | 2       | 86           | Simone, Tommy                  | 4 [1]                         | 3                      |
| 2         | 10      | 2       | 232          | Simone, Karl                   | 6 [1]                         | 3                      |
| 2         | 11      | 2       | 189          | Simone, Naomi, Tommy           | 7 (1) [1]                     |                        |

<sup>a</sup> Number of partial events (see methods) shown in parentheses; number of summary events shown in square brackets.

<sup>b</sup> Offscreen events happened between the current segment and the next segment.

Table S2: **Stimulus descriptions (replication experiment).**

| Segment | Duration (s) | Main characters                                  | Number of events <sup>a</sup> |                        |
|---------|--------------|--------------------------------------------------|-------------------------------|------------------------|
|         |              |                                                  | Onscreen                      | Offscreen <sup>b</sup> |
| 1       | 258          | Ji-Yoon, All faculty; Bill, Doodles <sup>c</sup> | 14 (1) [1]                    | 1                      |
| 2       | 40           | Joan, All faculty                                | 3 (2)                         | 0                      |
| 3       | 87           | Dean, Ji-Yoon                                    | 7 [1]                         | 3                      |
| 4       | 78           | Elliot, Yasmine                                  | 5 [1]                         | 1                      |
| 5       | 66           | Ji-Yoon, Yasmine                                 | 2 [1]                         | 9 (1)                  |
| 6       | 212          | Bill; Bill, Dafna; Elliot, Yasmine               | 11 (2)                        | 1                      |
| 7       | 134          | Ji-Yoon, Joan                                    | 5 (3)                         | 0                      |
| 8       | 38           | Bill, Lila                                       | 2                             | 0                      |
| 9       | 35           | Elliot, Yasmine                                  | 1                             | 2 (1)                  |
| 10      | 164          | Bill, Ji-Yoon                                    | 8 [2]                         | 5                      |
| 11      | 154          | Ji-Yoon, Habi, JuJu                              | 5 [1]                         | 9 [1]                  |
| 12      | 216          | Joan; Ji-Yoon, Lila; Ji-Yoon, Bill               | 6 [1]                         | 0                      |
| 13      | 56           | Ji-Yoon, Bill                                    | 2 [1]                         |                        |

<sup>a</sup> Number of partial events (see methods) shown in parentheses; number of summary events shown in square brackets.

<sup>b</sup> Offscreen events happened between the current segment and the next segment.

<sup>c</sup> Characters from different scenes are separated by “;”.

Table S3: List of datasets analyzed in our meta-analysis (see Fig. 8).

| Dataset                             | Short name  | Description                                                                                                                                                                                                                                                                                                                                                                                                                             | Category   | Number of observations | Observation type | Number of words |
|-------------------------------------|-------------|-----------------------------------------------------------------------------------------------------------------------------------------------------------------------------------------------------------------------------------------------------------------------------------------------------------------------------------------------------------------------------------------------------------------------------------------|------------|------------------------|------------------|-----------------|
| Internet Movie Script Database      | IMSDb       | A collection of transcripts from roughly 1000 popular movies.                                                                                                                                                                                                                                                                                                                                                                           | Film       | 1091                   | Transcript       | 26023348        |
| Movie Dialogues Dataset             | Movies      | A large collection of fictional conversations extracted from raw movie scripts.                                                                                                                                                                                                                                                                                                                                                         | Film       | 304713                 | Utterance        | 3209921         |
| Switchboard Dialog Act Corpus       | Switchboard | A collection of five-minute telephone conversations between two participants, annotated with speech act tags.                                                                                                                                                                                                                                                                                                                           | Speech     | 122646                 | Utterance        | 2052779         |
| Supreme Court Corpus                | SCOTUS      | A collection of cases from the U.S. Supreme Court, along with transcripts of oral arguments.                                                                                                                                                                                                                                                                                                                                            | Speech     | 1700789                | Utterance        | 71889094        |
| Tennis Interviews                   | Tennis      | Transcripts for tennis singles post-match press conferences for major tournaments between 2007 to 2015.                                                                                                                                                                                                                                                                                                                                 | Speech     | 163948                 | Utterance        | 7043118         |
| Persuasion for Good Corpus          | PfG         | A collection of online conversations generated by Amazon Mechanical Turk workers, where one participant (the persuader) tries to convince the other (the persuadee) to donate to a charity.                                                                                                                                                                                                                                             | Speech     | 20932                  | Utterance        | 351759          |
| Intelligence Squared Debates Corpus | IQ2         | This dataset contains transcripts of debates held as part of Intelligence Squared Debates.                                                                                                                                                                                                                                                                                                                                              | Speech     | 26562                  | Utterance        | 1898509         |
| Group Affect and Performance Corpus | GAP         | Group members completed a Winter Survival Task (WST), a group decision-making exercise where participants must rank 15 items according to their importance in a hypothetical plane crash scenario. Participants first rank the items individually. Then, each group was given a maximum of 15 minutes to complete the WST. The group's conversations and deliberations during this task were recorded as conversations in this dataset. | Speech     | 8009                   | Utterance        | 45989           |
| The Chair                           | Chair       | Scraped transcripts from The Chair, Season 1.                                                                                                                                                                                                                                                                                                                                                                                           | Television | 6                      | Transcript       | 19197           |
| Friends Corpus                      | Friends     | A collection of all the conversations that occurred over 10 seasons of Friends, a popular American TV sitcom that ran in the 1990s.                                                                                                                                                                                                                                                                                                     | Television | 67373                  | Utterance        | 622894          |
| Gutenberg Dialogue Dataset          | Gutenberg   | Dialogues extracted from the Project Gutenberg collection.                                                                                                                                                                                                                                                                                                                                                                              | Text       | 14773741               | Utterance        | 327519461       |
| Reddit Corpus                       | Reddit      | A collection of Corporuses of Reddit data built from Pushshift.io Reddit Corpus. Each Corpus contains posts and comments from an individual subreddit from its inception until Oct 2018.                                                                                                                                                                                                                                                | Text       | 74468                  | Utterance        | 3080662         |

Table S4: Part of speech pattern templates used to identify verb tenses in our meta analysis. Part of speech tags are represented between angled brackets, and pipes (|) denote instances where *any* of the two or more parts of speech are considered a match when they appear at the given position in the indicated sequence. The plus signs (+) denote that one or more repetitions of the given sequence within a single sentence are still counted as a “single” instance of the given tense. Part of speech tags are defined in Table S5.

| Tense                              | Pattern template                                        |
|------------------------------------|---------------------------------------------------------|
| conditional continuous             | <MD><BE><VBG HVG BEG>+                                  |
| conditional continuous passive     | <MD><BE><BEG><VBN VBD>+                                 |
| conditional indefinite             | <MD><BE DO VB HV>+                                      |
| conditional indefinite passive     | <MD><BE><VBN VBD>+                                      |
| conditional perfect                | <MD><HV><HVN BEN VBN VBD>+                              |
| conditional perfect continuous     | <MD><HV><BEN><VBG HVG BEG>+                             |
| conditional perfect passive        | <MD><HV><BEN><VBN VBD>+                                 |
| future continuous                  | <MDF><BE><VBG HVG BEG>+                                 |
| future continuous passive          | <MDF><BE><BEG><VBN VBD>+                                |
| future indefinite                  | <MDF><BE DO VB HV>+                                     |
| future indefinite passive          | <MDF><BE><VBN VBD>+                                     |
| future perfect                     | <MDF><HV><HVN BEN VBN VBD>+                             |
| future perfect continuous          | <MDF><HV><BEN><VBG HVG BEG>+                            |
| future perfect continuous passive  | <MDF><HV><BEN><BEG><VBN VBD>+                           |
| future perfect passive             | <MDF><HV><BEN><VBN VBD>+                                |
| infinitive                         | <TO><BE HV VB>+                                         |
| past continuous                    | <BED BEDZ><VBG HVG BEG>+                                |
| past continuous passive            | <BED BEDZ><BEG><VBN VBD>+                               |
| past indefinite                    | <DOD><VB HV DO> <BEDZ BED HVD VBN VBD>+                 |
| past indefinite passive            | <BED BEDZ><VBN VBD>+                                    |
| past perfect                       | <HVD><BEN VBN HVD HVN>+                                 |
| past perfect continuous            | <HVD><BEN><HVG BEG VBG>+                                |
| past perfect continuous passive    | <HVD><BEN><BEG><VBN VBD>+                               |
| past perfect passive               | <HVD><BEN><VBN VBD>+                                    |
| present continuous                 | <BEM BER BEZ><BEG VBG HVG>+                             |
| present continuous passive         | <BEM BER BEZ><BEG><VBN VBD>+                            |
| present indefinite                 | <DO DOZ><DO HV VB>+ <DO HV VB BEZ DOZ BER HVZ BEM VBZ>+ |
| present indefinite passive         | <BEM BER BEZ><VBN VBD>+                                 |
| present perfect                    | <HV HVZ><BEN HVD VBN VBD>+                              |
| present perfect continuous         | <HV HVZ><BEN><VBG BEG HVG>+                             |
| present perfect continuous passive | <HV HVZ><BEN><BEG><VBN VBD>+                            |
| present perfect passive            | <HV HVZ><BEN><VBN VBD>+                                 |

Table S5: Part of speech tag definitions.

| <b>Tag</b> | <b>Part of speech</b>                                     |
|------------|-----------------------------------------------------------|
| BE         | Be                                                        |
| BEG        | Related to beginning or gerundive form                    |
| BEM        | Am (first person singular present of BE)                  |
| BEN        | Been (past participle of BE)                              |
| BER        | Are (second person singular and all plural present of BE) |
| BEZ        | Is (third person singular present of BE)                  |
| BED        | Were (past plural of BE)                                  |
| BEDZ       | Was (past singular of BE)                                 |
| DO         | Do                                                        |
| DOD        | Did (past tense of DO)                                    |
| DOZ        | Do, 3rd person singular present                           |
| HV         | Have (archaic form for historical texts)                  |
| HVD        | Have, past tense (archaic)                                |
| HVG        | Have, gerund or present participle (archaic)              |
| HVN        | Have, past participle (archaic)                           |
| HVZ        | Have, 3rd person singular present (archaic)               |
| MD         | Modal                                                     |
| MDF        | Modal, future tense                                       |
| TO         | To                                                        |
| VB         | Verb, base form                                           |
| VBD        | Verb, past tense                                          |
| VBG        | Verb, gerund or present participle                        |
| VBN        | Verb, past participle                                     |
| VBP        | Verb, non-3rd person singular present                     |
| VBZ        | Verb, 3rd person singular present                         |

Table S6: Keywords and phrases used to identify references to the past.

|           |               |               |                  |            |
|-----------|---------------|---------------|------------------|------------|
| ago       | elapsed       | last month    | olden days       | thus far   |
| already   | expired       | last night    | once             | to date    |
| antiquity | final         | last quarter  | once upon a time | up to now  |
| back when | formerly      | last season   | previously       | used to    |
| before    | had           | last semester | recently         | used to be |
| bygone    | heretofore    | last time     | said             | was        |
| ceased    | historically  | last week     | since            | were       |
| concluded | hitherto      | last year     | so far           | wrote      |
| did       | in the past   | long ago      | terminated       | yesterday  |
| earlier   | in those days | made          | then             | yesteryear |

Table S7: Keywords and phrases used to identify references to the future.

|               |               |               |                |            |
|---------------|---------------|---------------|----------------|------------|
| after         | going to      | later         | next time      | shortly    |
| anticipated   | hereafter     | later on      | next week      | some day   |
| can           | imminently    | looming       | next year      | soon       |
| could         | impending     | may           | on the horizon | subsequent |
| down the line | in the cards  | might         | plan to        | succeeding |
| eventual      | in the future | next month    | predicted      | to be      |
| eventually    | in the works  | next quarter  | prospective    | tomorrow   |
| forthcoming   | in time       | next season   | scheduled to   | upcoming   |
| futuristic    | intend to     | next semester | shall          | will       |

### Task design

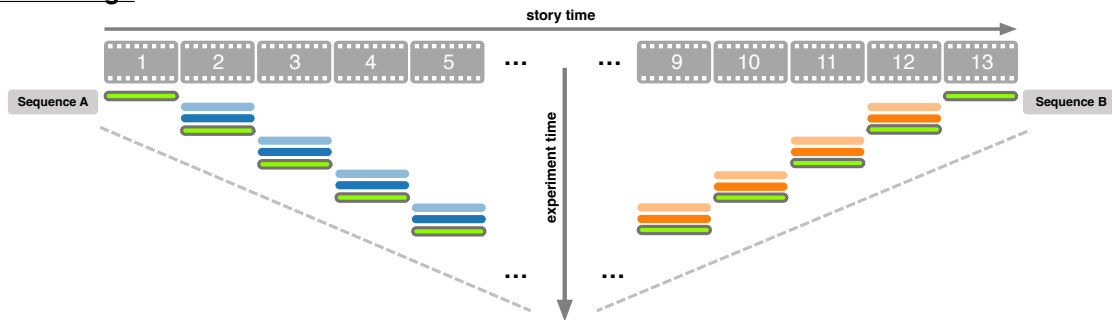

### Conditions

- █ Watch
- █ u-R: uncued retrodiction
- █ u-P: uncued prediction
- █ c-R: character-cued retrodiction
- █ c-P: character-cued prediction

### Data overview

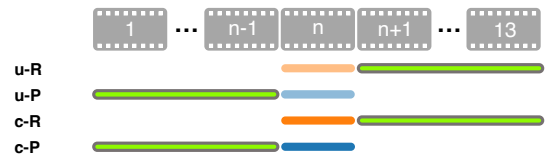

Figure S1: **Task overview (replication experiment)**. Participants in our replication experiment watched segments from the television series *The Chair*. They made free-form text responses to either retrodict what had happened in the previous segment, or predict what would happen in the next segment. We systematically varied whether participants watched the segments in forward or reverse chronological order, whether (or not) responses were cued using the main characters in the target segment, and which other segments participants had watched prior to making a response. For each segment, we collected several retrodiction or prediction across different experimental conditions. Experiment time is denoted along the vertical axis, storyline segments orders are indicated along the horizontal axis, and the colors denote experimental tasks (conditions).



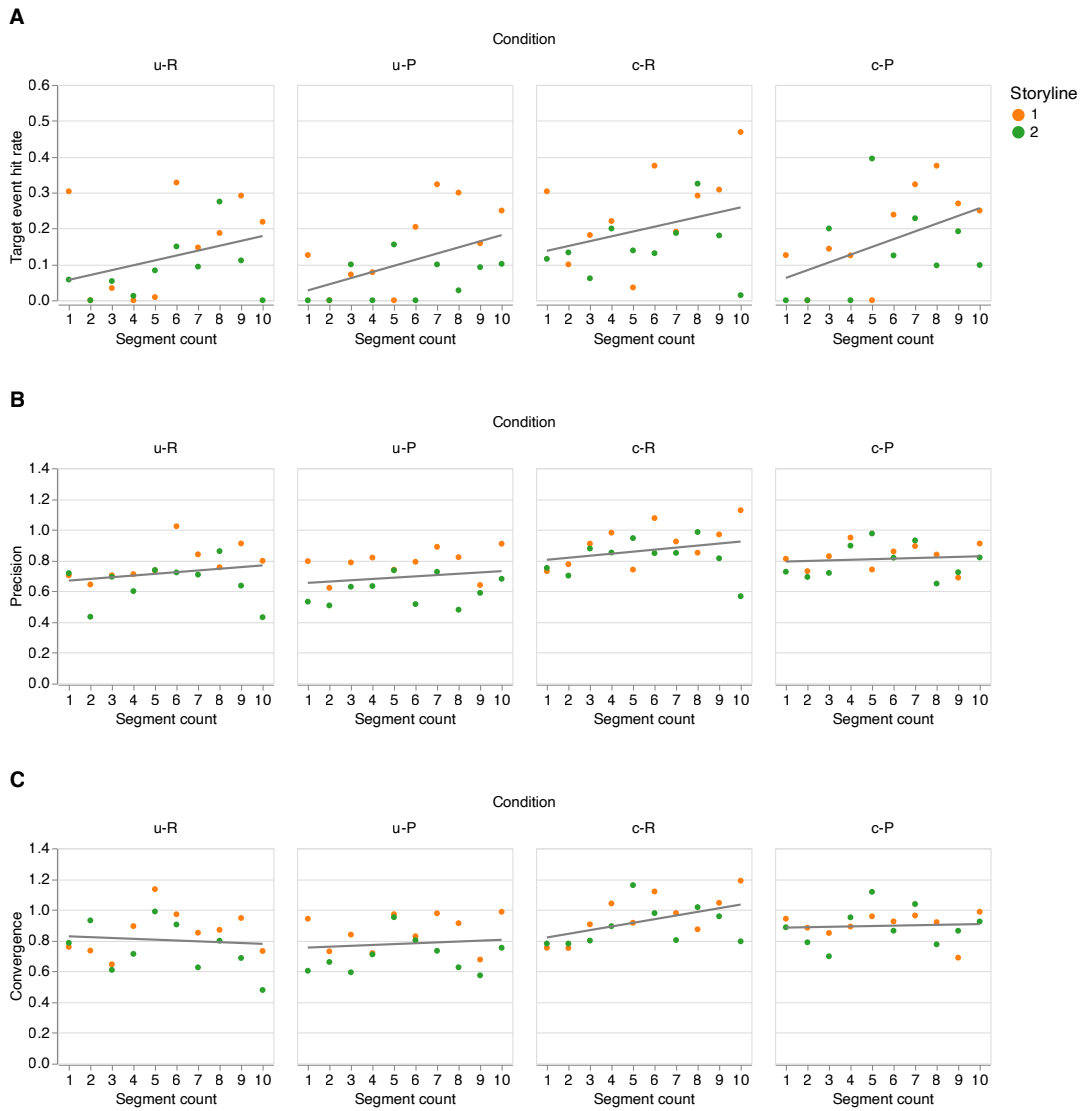

Figure S2: Mean proportion of target events hit (A), precision (B), and convergence (C) as a function of number of segments watched in each storyline, in participants' (n=36) uncued and character-cued retrodictions and predictions (main experiment). Grey lines represent the least squares fits.

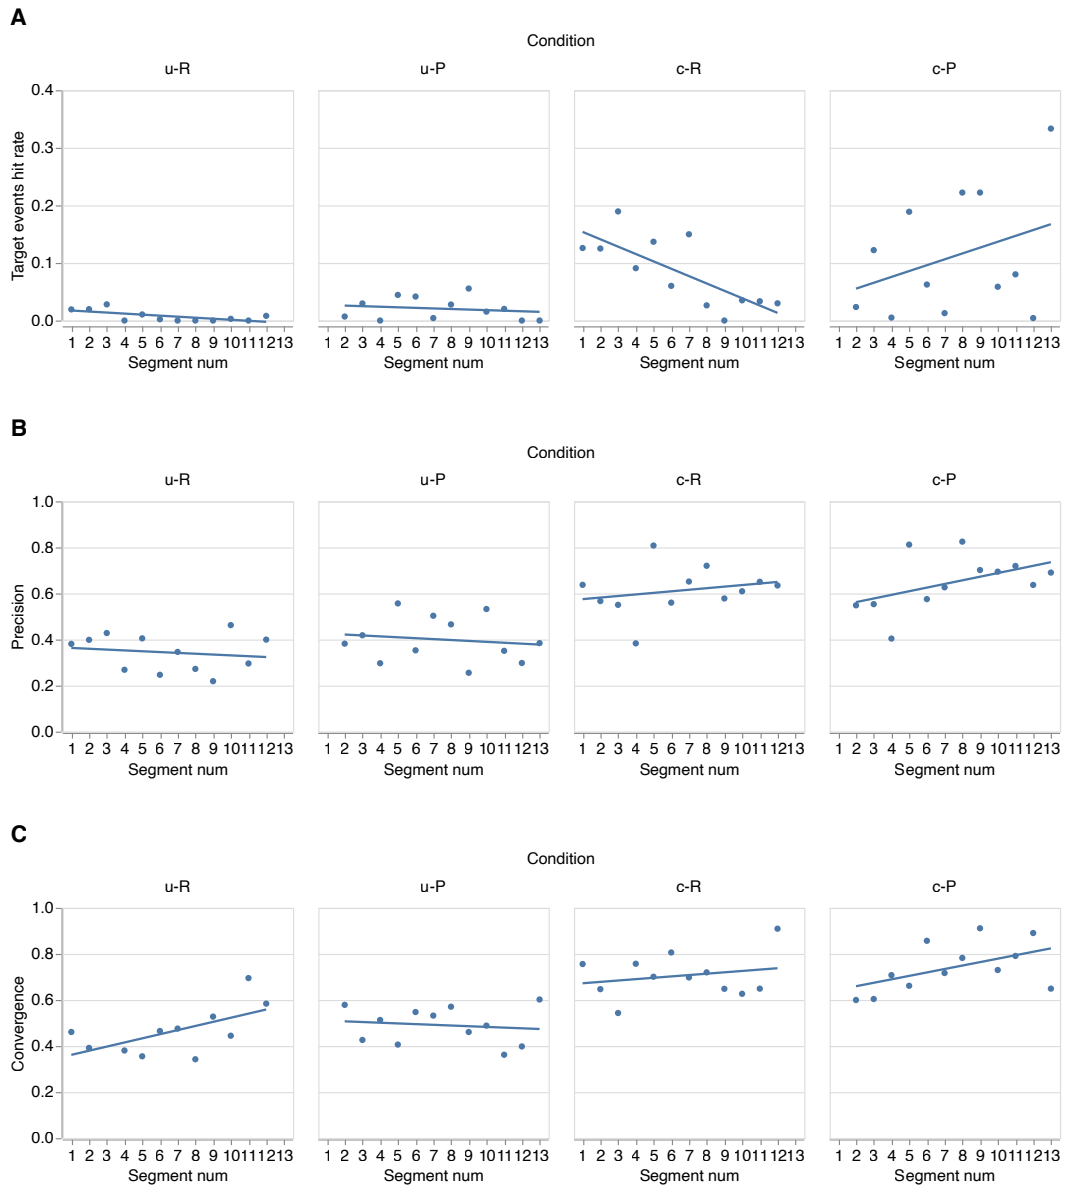

Figure S3: Mean proportion of target events hit (A), precision (B), and convergence (C) as a function of number of segments watched, in participants' (n=37) uncued and character-cued retrodictions and predictions (replication experiment). Blue lines represent the least squares fits.

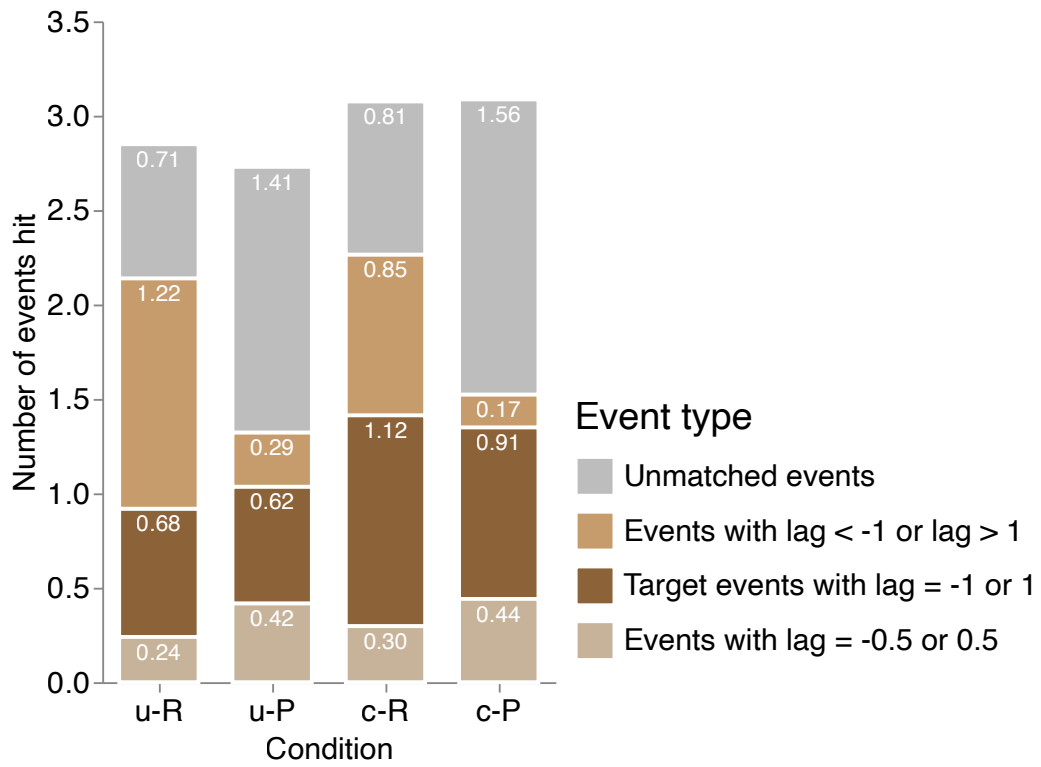

Figure S4: Mean number of events hit for each event type, in participants' (n=36) uncued and character-cued retrodictions and predictions, averaged across just-watched segments (main experiment).

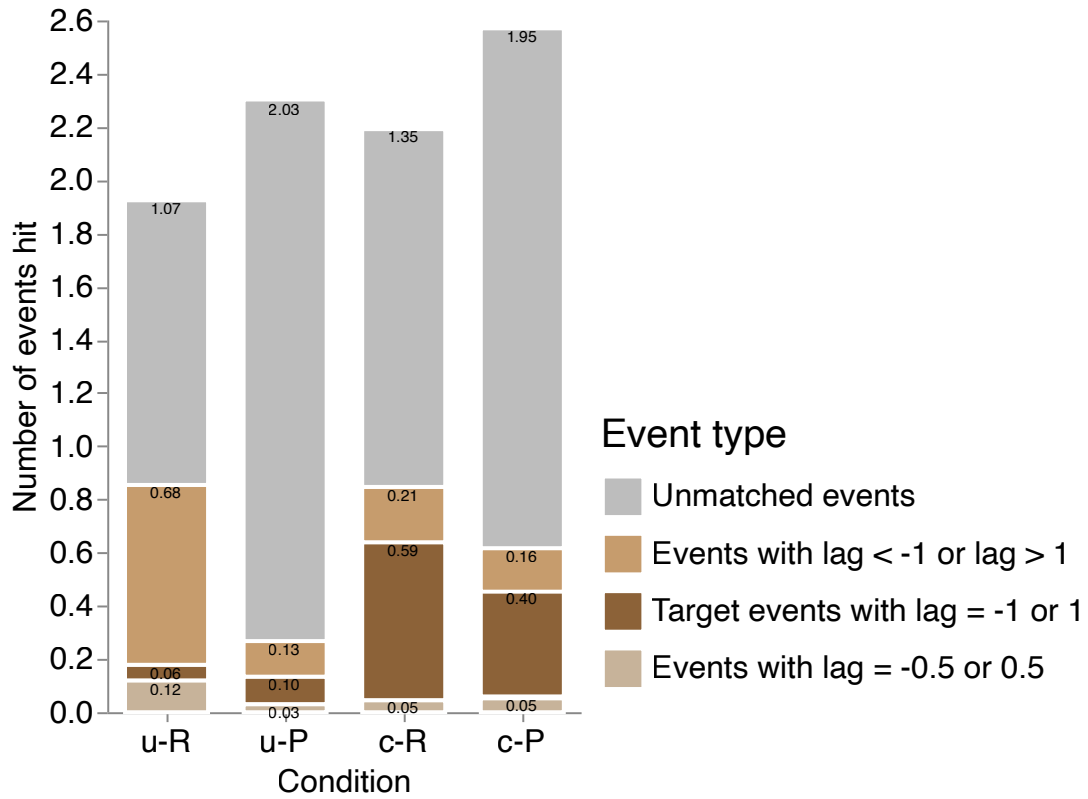

Figure S5: Mean number of events hit for each event type, in participants' (n=37) uncued and character-cued retrdictions and predictions, averaged across just-watched segments (replication experiment).

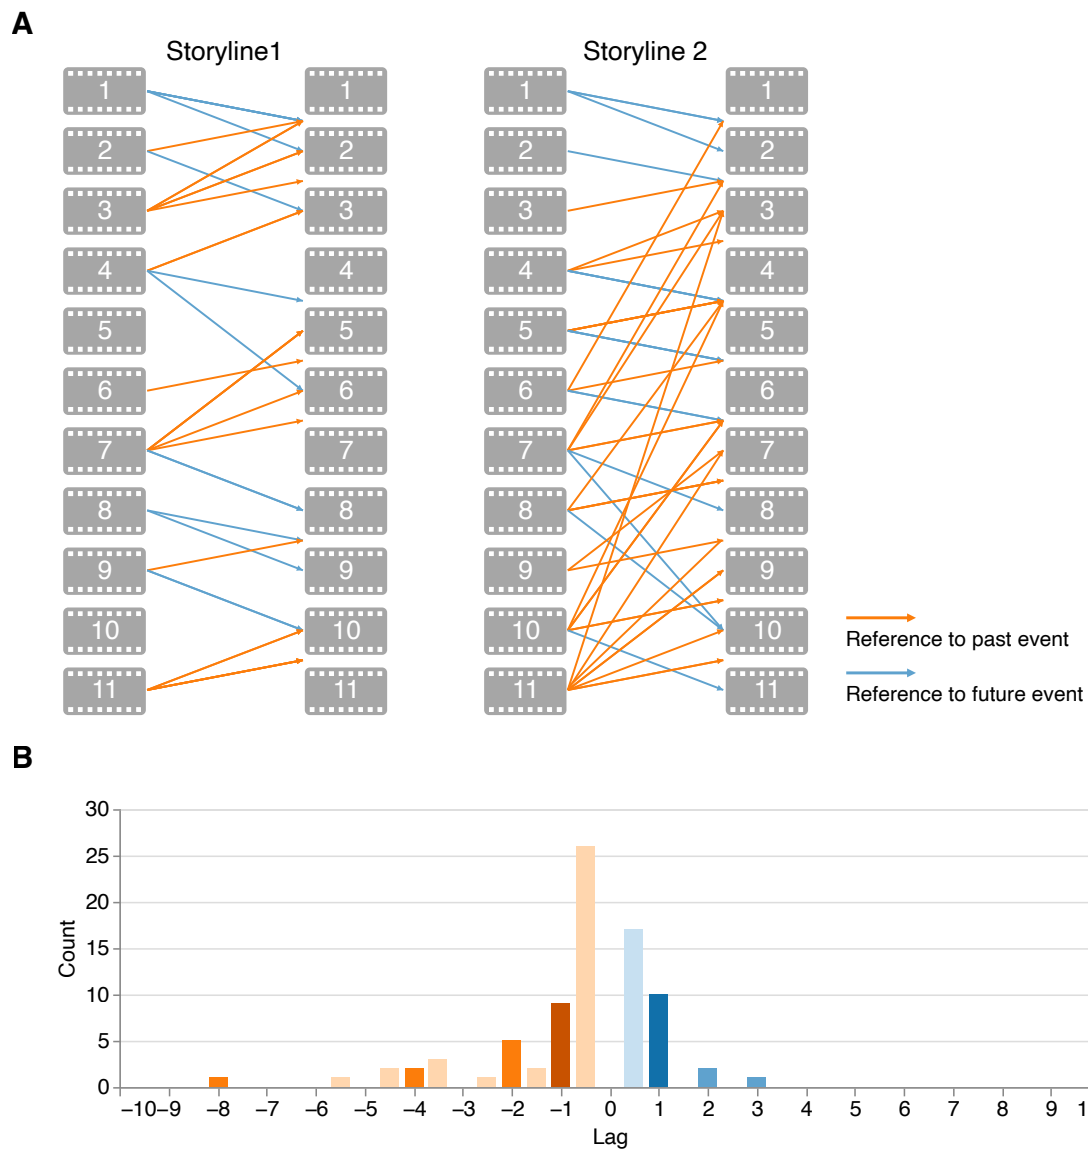

Figure S6: **(A)** All references in each storyline (main experiment). **(B)** Distribution of reference lags (main experiment).

**A**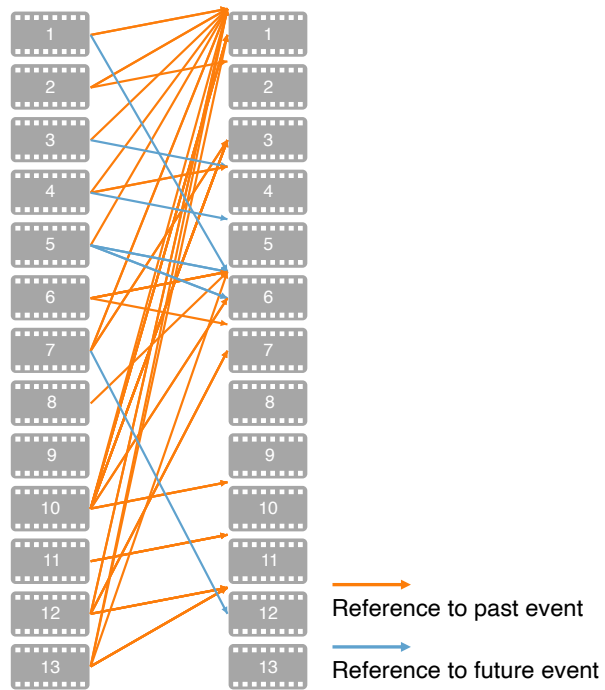**B**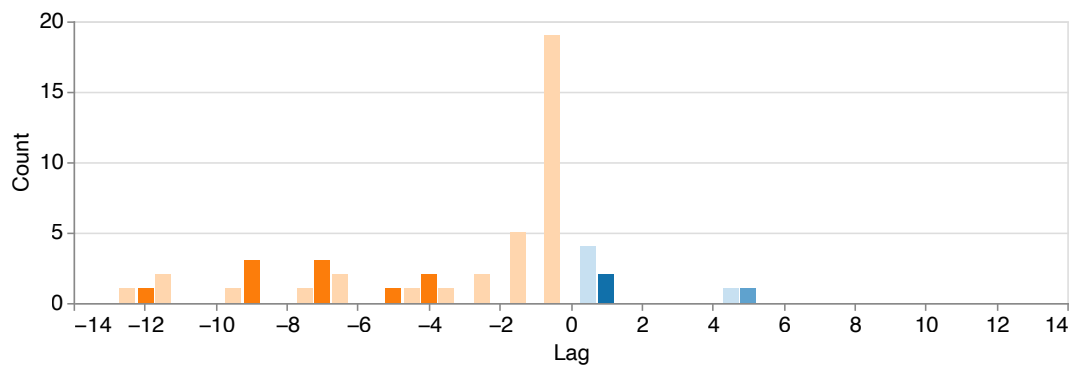

Figure S7: **(A)** All references (replication experiment). **(B)** Distribution of reference lags (replication experiment).

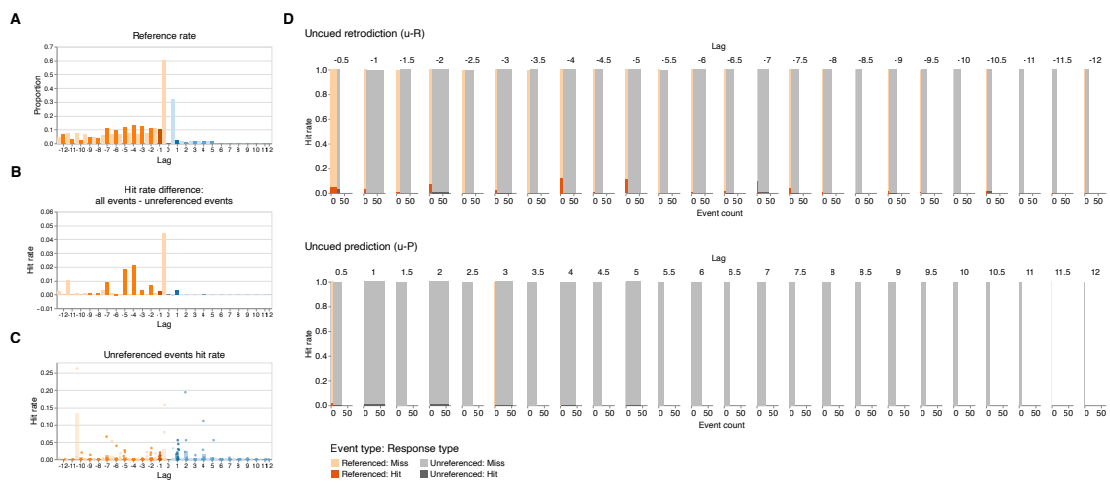

Figure S8: **Characters' references drive participants' retrodiction performance (replication experiment).** **A. Reference rate as a function of lag.** Across all possible just-watched segments (lag 0), the bar heights denote the average proportions of events referenced in other past or future segments. **B. Difference in hit rates between all events and unreferenced events.** To highlight the effect of characters' references to past and future events on participants' retrodictions and predictions, here we display the difference in across-segment mean hit rates between all events and unreferenced events, as a function of temporal distance (lag) to the just-watched segment. **C. Hit rates for unreferenced events.** Participants' ( $n=37$ ) average response hit rates for unreferenced events are displayed as a function of temporal distance to the just-watched segment. Error bars denote bootstrapped 95% confidence intervals. Panels A–C: colors are described in the Figure 4 caption. **D. Hit rates and counts of referenced and unreferenced events.** As a function of temporal distance to the just-watched segment, the sub-panels display the across-segment mean numbers ( $x$ -axes) and hit rates ( $y$ -axes) of referenced (red) and unreferenced (gray) events that participants hit (darker shading) or missed (lighter shading) in their uncued retrodictions (top sub-panel) and uncued predictions (bottom sub-panel). Intuitively, the widths of the rectangles at each lag denote the total number of events at each possible lag. The darker shading denotes the proportions of events that participants retrodicted or predicted, and the lighter shading denotes the proportions of events that participants “missed” in their responses.

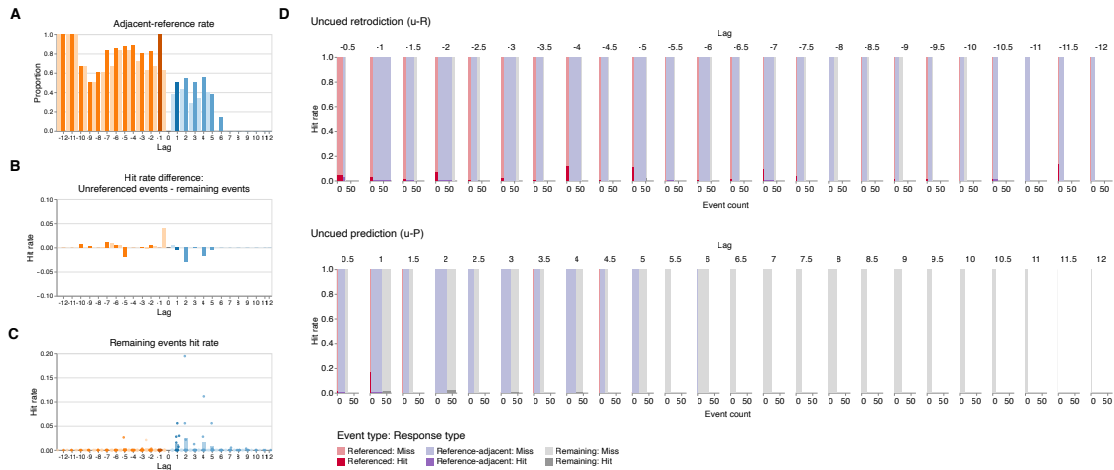

**Figure S9: Hit rates of reference-adjacent events (replication experiment).** **A. Adjacent reference rate for unreferenced events as a function of lag.** Across all possible just-watched segments (lag 0), the bar heights denote the average proportion of unreferenced events in other past or future segments that were temporally adjacent to any referenced event. **B. Difference in hit rates between unreferenced events and remaining events.** To highlight the effect of reference adjacency on retrodiction and prediction of unreferenced events, here we display the difference in across-segment mean hit rates between unreferenced events and remaining events, as a function of temporal distance (lag) to the just-watched segment. **C. Hit rates for remaining events.** Participants' (n=37) across-segment mean response hit rates for unreferenced events that were *not* temporally adjacent to any referenced events are displayed as a function of temporal distance to the just-watched segment. Error bars denote bootstrapped 95% confidence intervals. Panels A–C: colors are described in the Figure 4 caption. **D. Hit rates and counts of referenced, reference-adjacent, and remaining events.** As a function of temporal distance to the just-watched segment, the sub-panels display the numbers (*x*-axes) and proportions (*y*-axes) of referenced (red), reference-adjacent (purple), and remaining (gray) events that participants hit (darker shading) or missed (lighter shading) in their uncued retrodictions (top sub-panel) and uncued predictions (bottom sub-panel).



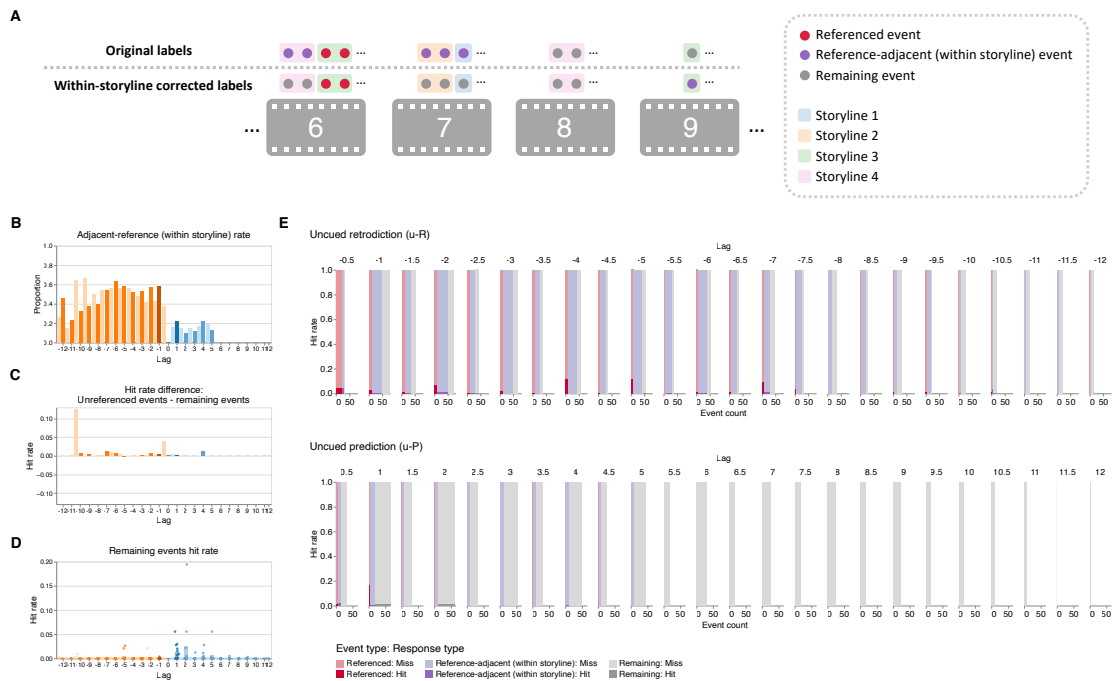

Figure S10: **Within-storyline reference-adjacent events are associated with higher hit rates (replication experiment).** **A. Illustration of annotation approach.** Rather than labeling reference-adjacent events as whether they were temporally adjacent to a referenced event using the original segment sequences, here we used within-storyline corrected reference-adjacency labels. We determined four storylines in the segments used in the replication experiment and assigned a storyline label for each event (shown as different background colors of each event). We then labeled reference-adjacent events as whether they were temporally adjacent to a referenced event within the same storyline (same background colors). **B. Adjacent reference rate for unreferenced events as a function of lag.** Across all possible just-watched segments (lag 0), the bar heights denote the average proportion of unreferenced events in other past or future segments that were temporally adjacent to any referenced event. **C. Difference in hit rates between unreferenced events and remaining events.** To highlight the effect of reference adjacency on retrodiction and prediction of unreferenced events, here we display the difference in across-segment mean hit rates between unreferenced events and remaining events, as a function of temporal distance (lag) to the just-watched segment. **D. Hit rates for remaining events.** Participants' ( $n=37$ ) across-segment mean response hit rates for unreferenced events that were *not* temporally adjacent to any referenced events are displayed as a function of temporal distance to the just-watched segment. Error bars denote bootstrapped 95% confidence intervals. Panels A–C: colors are described in the Figure 4 caption. **E. Hit rates and counts of referenced, reference-adjacent, and remaining events.** As a function of temporal distance to the just-watched segment, the sub-panels display the numbers ( $x$ -axes) and proportions ( $y$ -axes) of referenced (red), reference-adjacent (purple), and remaining (gray) events that participants hit (darker shading) or missed (lighter shading) in their uncued retrodictions (top sub-panel) and uncued predictions (bottom sub-panel).

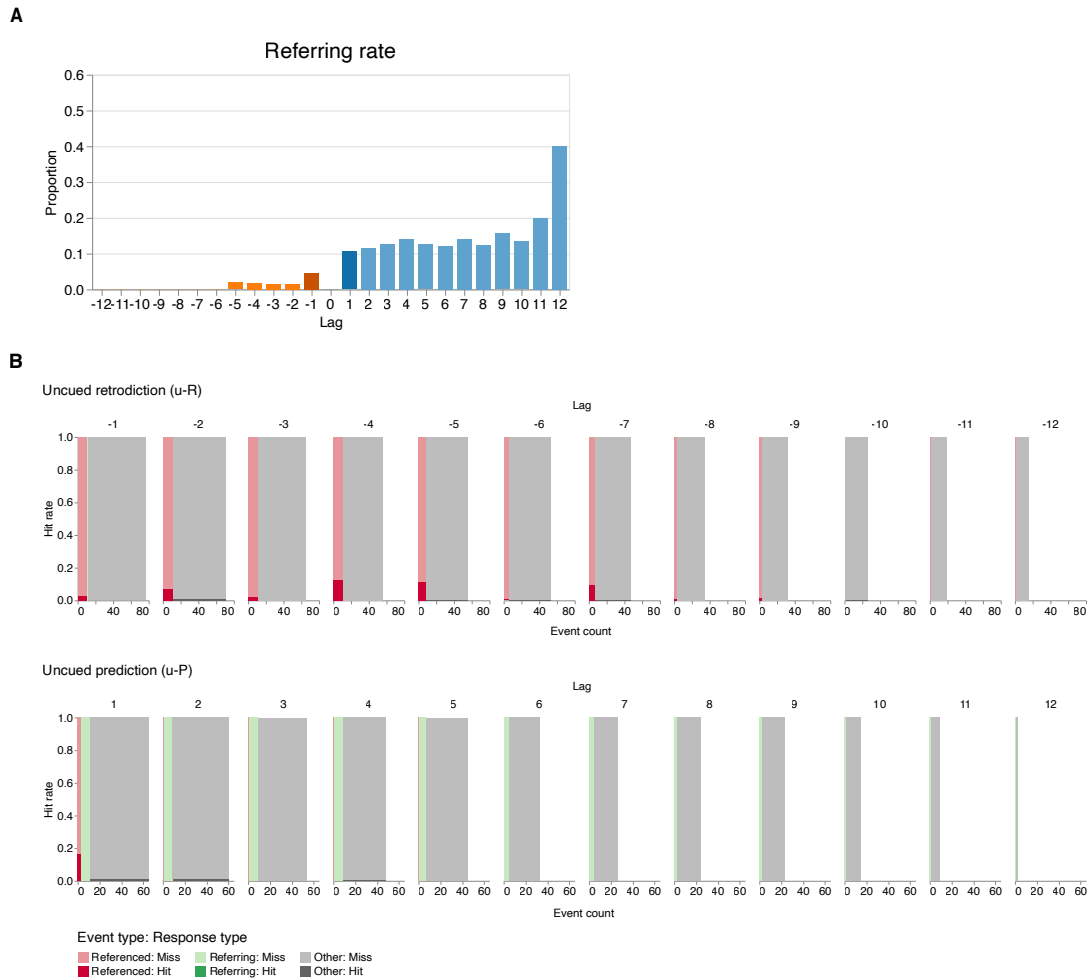

Figure S11: **Hit rates for referenced versus referring events (replication experiment).** **A. Referring rate as a function of lag.** Across all possible just-watched segments (lag 0), the bar heights denote the across-segment mean proportions of events containing references to events in other past or future segments in our replication experiment’s stimuli. The bar colors are described in the Figure 4 caption. **B. Hit rates and counts of referenced, referring, and other events.** As a function of temporal distance to the just-watched segment, the sub-panels display the numbers ( $x$ -axes) and hit rates ( $y$ -axes) of referenced (red), referring (green), and other (gray) events that participants hit (darker shading) or missed (lighter shading) in their uncued retrodictions (top sub-panel) and uncued predictions (bottom sub-panel).

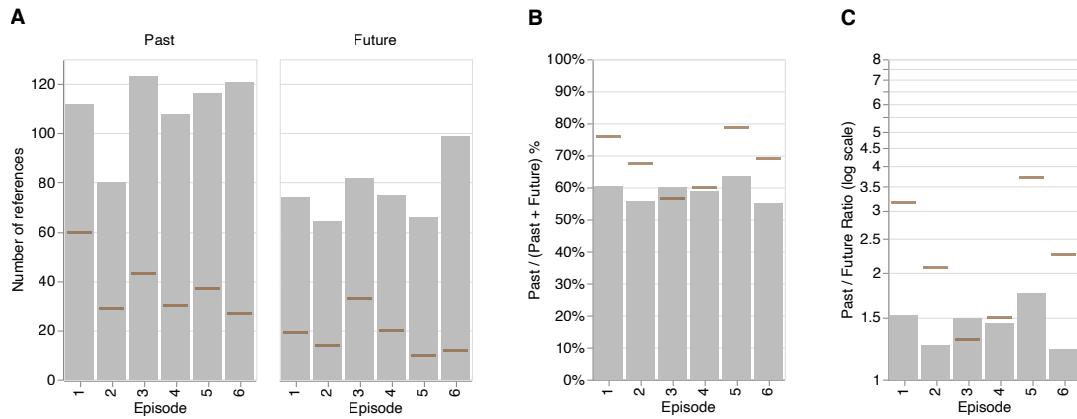

Figure S12: **Comparison of automatic and manual approach for identifying references to past and future events in *The Chair*, Season 1, Episodes 1–6.** **A. Numbers of references to past and future events.** Ticks indicate manually identified numbers, and bar heights indicate automatically identified numbers. We used Episode 1 from this series as the stimulus in our replication experiment. **B. Proportions of references to past and future events.** Ticks indicate the proportions of references to past events in all references (past + future) based on manually identified numbers, and bar heights indicate the proportions based on automatically identified numbers. **C. Ratios of references to past and future events.** Ticks indicate the ratios of references to past events and future events based on manually identified numbers, and bar heights indicate the ratios based on automatically identified numbers.
